# Supplementary material for: Identification of Human Global, Tissue and Within-Tissue Cell-Specific Stably Expressed Genes at Single-Cell Resolution
Source: MDPI journal article supplement (doi:10.3390/ijms231810214), 2022-09-06
Supplement: s1 [file s1]

**A**

unique to PBMC,  
10x Genomics

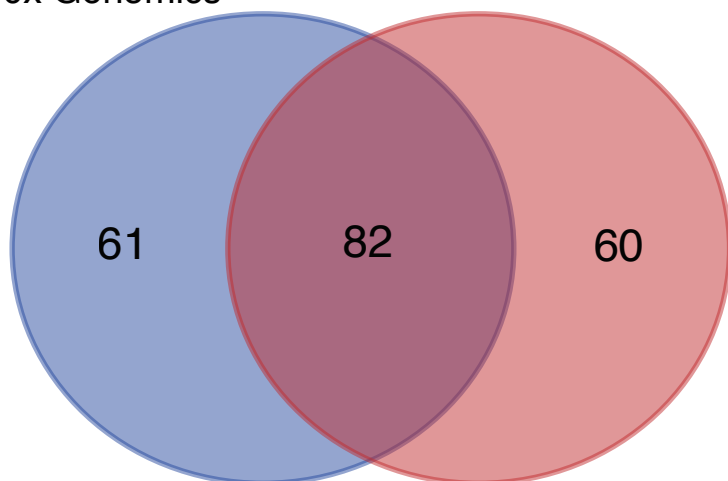

unique to Smart-seq  
or bulky RNA-seq

**B**

Smart-Seq

Microwell-Seq

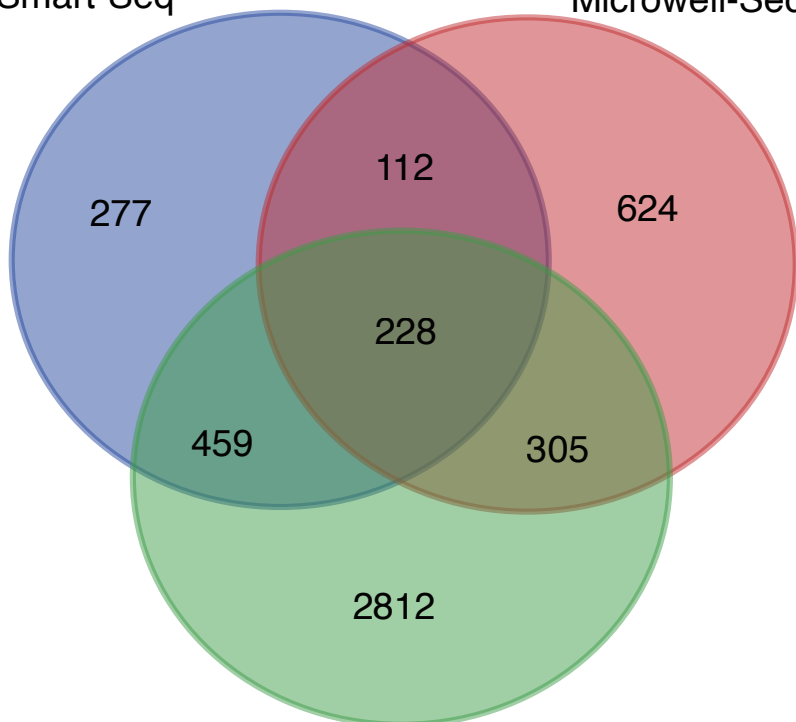

Bulky RNA-seq
