# Supplementary material for: Identification of Human Global, Tissue and Within-Tissue Cell-Specific Stably Expressed Genes at Single-Cell Resolution
Source: MDPI journal article supplement (doi:10.3390/ijms231810214), 2022-09-06
Supplement: s1 [file s1]

# Cell types and origins

presence

Y  
N

SEGS

Adult\_Liver  
Adult\_Intestine  
Adult\_Ureter  
Adult\_Gall\_Bladder  
Fetal\_Stomach  
Fetal\_Pancreas  
Fetal\_Eyes  
Fetal\_Lung  
Adult\_Esophagus  
Adult\_Cervix  
Adult\_Pancreas  
Adult\_Lung  
Adult\_Artery  
Adult\_Bladder  
Cord\_Blood  
Adult\_PBMC  
Adult\_Pleura  
Fetal\_Chorionic\_Villus  
Fetal\_Rid  
Fetal\_Intestine  
Fetal\_Muscle  
Fetal\_Adrenal\_Gland  
Fetal\_Brain  
Fetal\_Kidney  
Adult\_Adipose  
Fetal\_Calvaria  
Adult\_Stomach  
Adult\_Kidney  
Adult\_Heart  
Fetal\_Heart  
Adult\_Skin  
Adult\_Thyroid  
Adult\_Prostate  
Fetal\_Heart  
Adult\_Ovary  
Adult\_Fallopian\_Tube  
Placenta  
Adult\_Bone\_Marrow  
Fetal\_Spinal\_cord  
Adult\_Spleen  
Fetal\_Gonad  
Adult\_Brain  
Fetal\_Thymus  
Fetal\_Liver
