# Supplementary material for: Identification of Human Global, Tissue and Within-Tissue Cell-Specific Stably Expressed Genes at Single-Cell Resolution
Source: MDPI journal article supplement (doi:10.3390/ijms231810214), 2022-09-06
Supplement: s1 [file s1]

Number of SEGs

60  
40  
20  
0

0

Number of human tissues

spatio-temporal SEGs

total number: 408

0

10

20

30

40

0

10

20

30

40

0

10

20

30

40

0

10

20

30

40

0

10

20

30

40

0

10

20

30

40

0

10

20

30

40

0

10

20

30

40

0

10

20

30

40

0

10

20

30

40

0

10

20

30

40

0

10

20

30

40

0

10

20

30

40

0

10

20

30

40

0

10

20

30

40

0

10

20

30

40

0

10

20

30

40

0

10

20

30

40

0

10

20

30

40

0

10

20

30

40

0

10

20

30

40

0

10

20

30

40

0

10

20

30

40

0

10

20

30

40

0

10

20

30

40

0

10

20

30

40

0

10

20

30

40

0

10

20

30

40

0

10

20

30

40

0

10

20

30

40

0

10

20

30

40

0

10

20

30

40

0

10

20

30

40

0

10

20

30

40

0

10

20

30

40

0

10

20

30

40

0

10

20

30

40

0

10

20

30

40

0

10

20

30

40

0

10

20

30

40

0

10

20

30

40

0

10

20

30

40

0

10

20

30

40

0

10

20

30

40

0

10

20

30

40

0

10

20

30

40

0

10

20

30

40

0

10

20

30

40

0

10

20

30

40

0

10

20

30

40

0

10

20

30

40

0

10

20

30

40

0

10

20

30

40

0

10

20

30

40

0

10

20

30

40

0

10

20

30

40

0

10

20

30

40

0

10

20

30

40

0

10

20

30

40

0

10

20

30

40

0

10

20

30

40

0

10

20

30

40

0

10

20

30

40

0

10

20

30

40

0

10

20

30

40

0

10

20

30

40

0

10

20

30

40

0

10

20

30

40

0

10

20

30

40

0

10

20

30
