# Supplementary figures and images for: Identification of Human Global, Tissue and Within-Tissue Cell-Specific Stably Expressed Genes at Single-Cell Resolution
Source: MDPI journal article supplement (doi:10.3390/ijms231810214), 2022-09-06

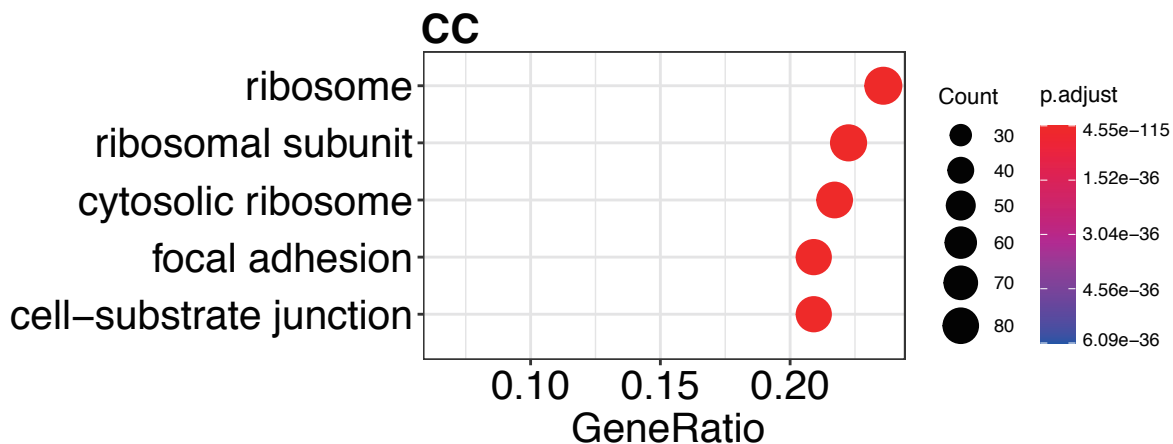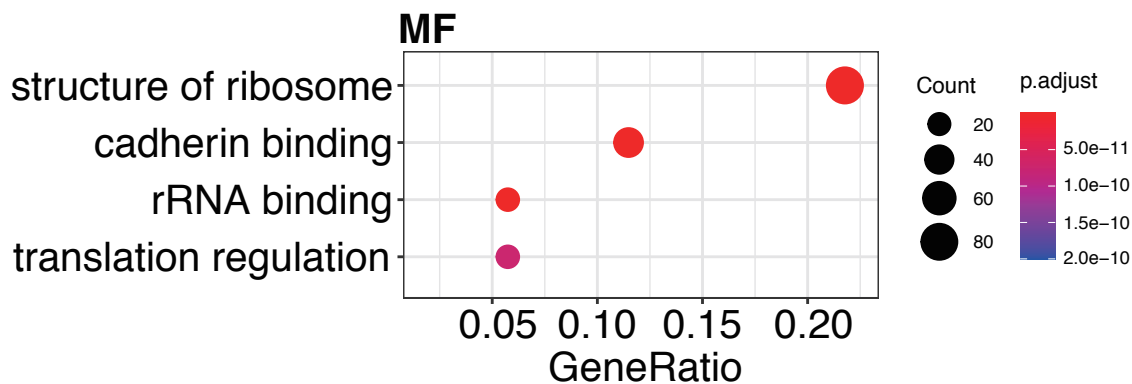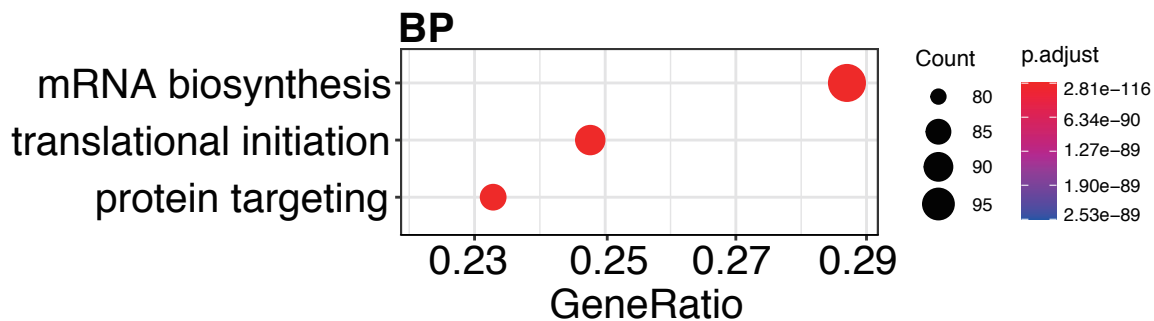

Supplement: s1 [file s1]
